# Supplementary material for: The role of surface energy control in organic photovoltaics based on solar paints
Source: Royal Society of Chemistry journal article supplement (doi:10.1039/c8ta09521c), 2019-01-01
Supplement: c8ta09521c1.pdf [file c8ta09521c1.pdf]

## Supporting Information

# The Role of Surface Energy Control in Organic Photovoltaics Based on Solar Paints

*Furqan Almyahi<sup>a,b</sup>, Thomas R. Andersen<sup>a\*</sup>, Adam Fahy<sup>a</sup>, Michael Dickinson<sup>a,c</sup>, Krishna Feron<sup>a,d</sup>, Warwick J. Belcher<sup>a</sup> and Paul C. Dastoor<sup>a</sup>.*

<sup>a</sup> Centre for Organic Electronics, University of Newcastle, University Drive, Callaghan, NSW 2308, Australia.

<sup>b</sup> Department of Physics, College of Science, University of Basrah, Iraq.

<sup>c</sup> School of Creative Industries, University of Newcastle, University Drive, Callaghan, NSW 2308, Australia

<sup>d</sup> CSIRO Energy Centre, Mayfield West, NSW 2304, Australia

\* Email: [Thomas.andersen@newcastle.edu.au](mailto:Thomas.andersen@newcastle.edu.au)

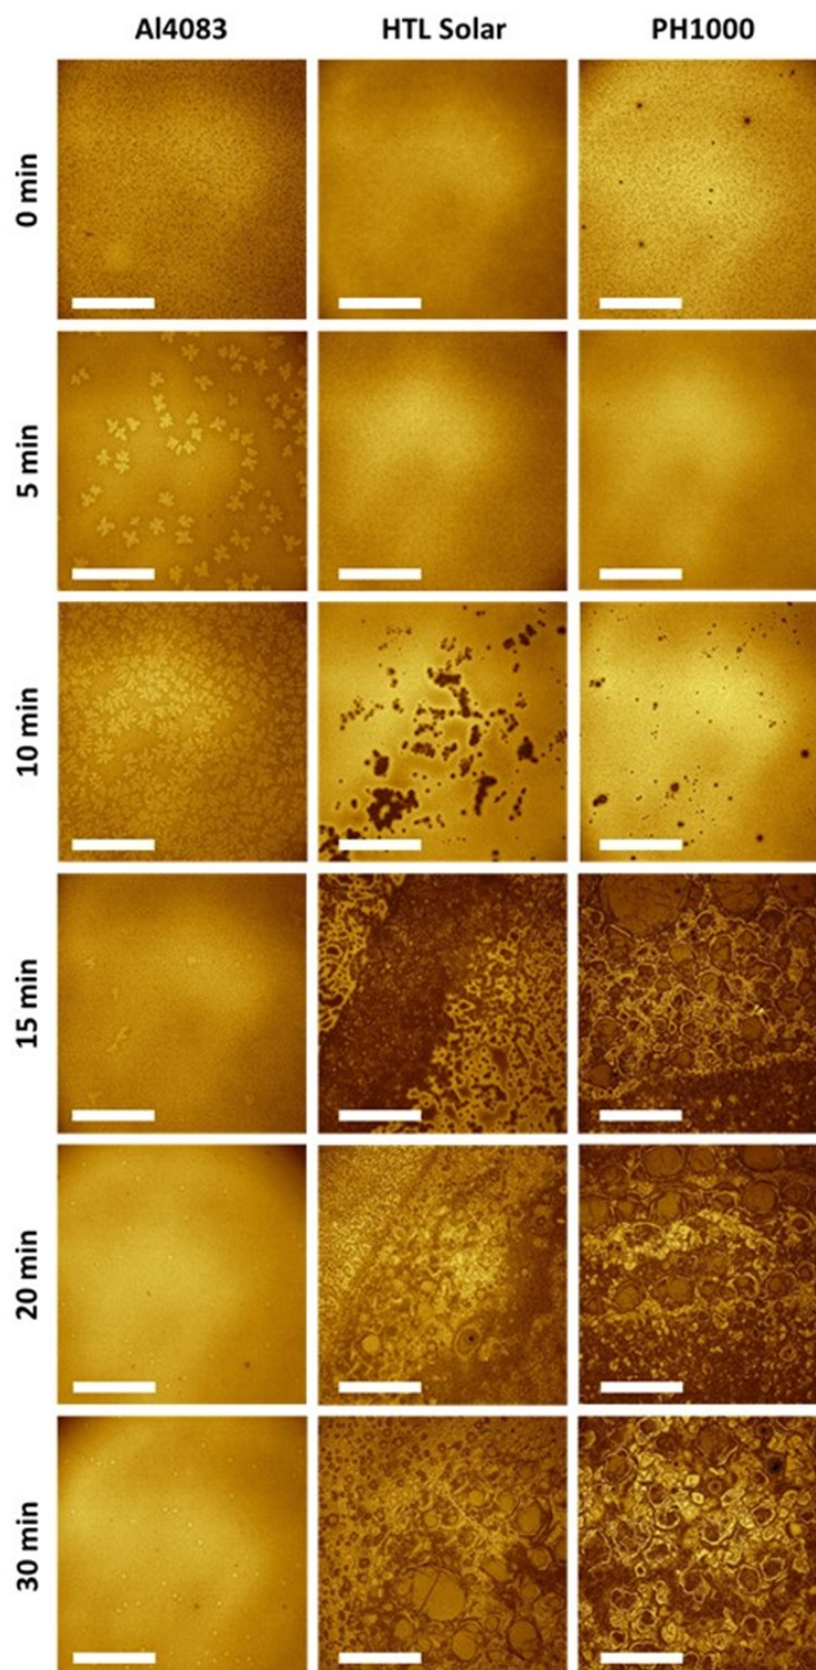

**Figure S1.** Reflection optical images of nanoparticle films spin coated onto three PEDOT:PSS formulations (Al4083, HTL Solar and PH1000) exposed to UVO for different lengths of time (0 - 30 min). Scale bar is 100  $\mu\text{m}$ .

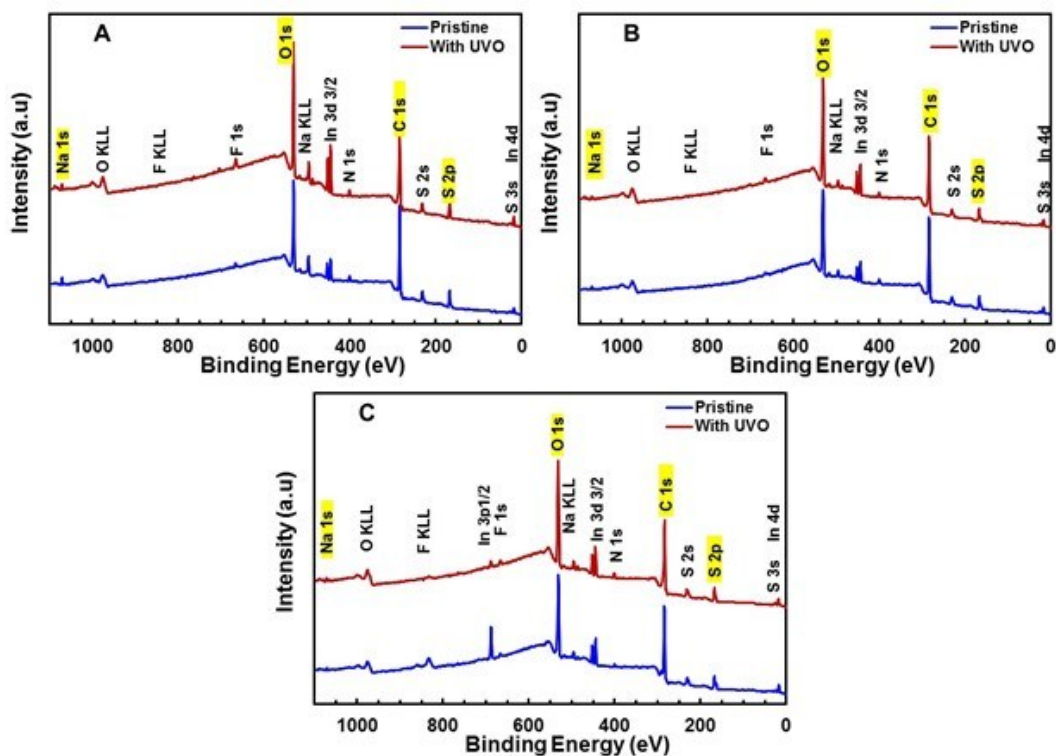

**Figure S2.** XPS survey spectra of PEDOT:PSS formulations (A) Al4083, (B) HTL Solar, and (C) PH1000 both with and without UVO treatment. Primary carbon, oxygen, sulphur and sodium peaks are labelled.

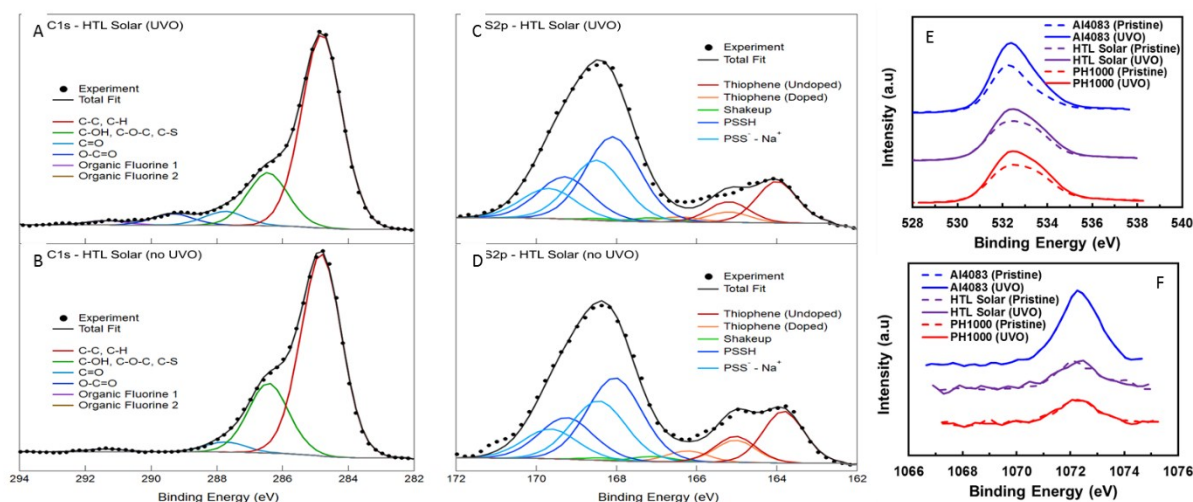

**Figure S3.** Fitting model applied to pristine HTL Solar S2P peak. C 1s (A, B), S 2p (C, D), O 1s (E) and Na 1s (F) region scans for both the pristine and ozone treated HTL Solar PEDOT:PSS films.

**Table S 1:** Extracted atomic concentrations from the XPS sulphur regional scan of the three PEDOT:PSS's before and after UVO treatment using the fitting showed in Figure S3.

| Sample Identifier | Name | Position | FWHM | %At Conc |
|-------------------|------|----------|------|----------|
|-------------------|------|----------|------|----------|

|                     |                         |       |     |      |
|---------------------|-------------------------|-------|-----|------|
| Al4083<br>No UVO    | Thiophene 3/2 (Undoped) | 164.0 | 1.2 | 4.4  |
|                     | Thiophene 1/2 (Undoped) | 165.2 | 1.2 | 4.3  |
|                     | Thiophene 3/2 (Doped)   | 165.2 | 1.2 | 3.0  |
|                     | Thiophene 1/2 (Doped)   | 166.4 | 1.2 | 3.0  |
|                     | Shakeup 3/2             | 167.1 | 1.2 | 0.4  |
|                     | Shakeup 1/2             | 168.3 | 1.2 | 0.4  |
|                     | PSS--Na+ (3/2)          | 168.1 | 1.6 | 24.9 |
|                     | PSS--Na+ (1/2)          | 169.3 | 1.6 | 24.3 |
|                     | PSSH (3/2)              | 168.5 | 1.6 | 17.8 |
|                     | PSSH (1/2)              | 169.7 | 1.6 | 17.4 |
| Al4083<br>UVO       | Thiophene 3/2 (Undoped) | 163.8 | 1.2 | 3.3  |
|                     | Thiophene 1/2 (Undoped) | 165.0 | 1.2 | 3.3  |
|                     | Thiophene 3/2 (Doped)   | 165.0 | 1.2 | 1.1  |
|                     | Thiophene 1/2 (Doped)   | 166.2 | 1.2 | 1.1  |
|                     | Shakeup 3/2             | 167.1 | 1.2 | 0.3  |
|                     | Shakeup 1/2             | 168.3 | 1.2 | 0.3  |
|                     | PSS--Na+ (3/2)          | 168.2 | 1.6 | 26.7 |
|                     | PSS--Na+ (1/2)          | 169.4 | 1.6 | 26.1 |
|                     | PSSH (3/2)              | 168.6 | 1.6 | 19.1 |
|                     | PSSH (1/2)              | 169.8 | 1.6 | 18.6 |
| HTL Solar<br>No UVO | Thiophene 3/2 (Undoped) | 163.8 | 1.2 | 9.8  |
|                     | Thiophene 1/2 (Undoped) | 165.0 | 1.2 | 9.5  |
|                     | Thiophene 3/2 (Doped)   | 165.0 | 1.2 | 4.2  |
|                     | Thiophene 1/2 (Doped)   | 166.2 | 1.2 | 4.1  |
|                     | Shakeup 3/2             | 167.1 | 1.2 | 1.0  |
|                     | Shakeup 1/2             | 168.3 | 1.2 | 1.0  |
|                     | PSS--Na+ (3/2)          | 168.0 | 1.6 | 20.8 |
|                     | PSS--Na+ (1/2)          | 169.2 | 1.6 | 20.4 |
|                     | PSSH (3/2)              | 168.4 | 1.6 | 14.9 |
|                     | PSSH (1/2)              | 169.6 | 1.6 | 14.5 |
| HTL Solar<br>UVO    | Thiophene 3/2 (Undoped) | 164.0 | 1.2 | 8.5  |
|                     | Thiophene 1/2 (Undoped) | 165.2 | 1.2 | 8.3  |
|                     | Thiophene 3/2 (Doped)   | 165.2 | 1.2 | 2.1  |
|                     | Thiophene 1/2 (Doped)   | 166.4 | 1.2 | 2.1  |
|                     | Shakeup 3/2             | 167.1 | 1.2 | 0.8  |
|                     | Shakeup 1/2             | 168.3 | 1.2 | 0.8  |
|                     | PSS--Na+ (3/2)          | 168.1 | 1.6 | 22.8 |
|                     | PSS--Na+ (1/2)          | 169.3 | 1.6 | 22.4 |
|                     | PSSH (3/2)              | 168.5 | 1.6 | 16.3 |
|                     | PSSH (1/2)              | 169.7 | 1.6 | 16.0 |
| PH1000<br>No UVO    | Thiophene 3/2 (Undoped) | 164.0 | 1.2 | 10.6 |
|                     | Thiophene 1/2 (Undoped) | 165.2 | 1.2 | 10.4 |
|                     | Thiophene 3/2 (Doped)   | 165.2 | 1.6 | 4.6  |
|                     | Thiophene 1/2 (Doped)   | 166.4 | 1.6 | 4.5  |
|                     | Shakeup 3/2             | 167.1 | 1.6 | 1.1  |
|                     | Shakeup 1/2             | 168.3 | 1.6 | 1.0  |
|                     | PSS--Na+ (3/2)          | 168.1 | 1.6 | 20.0 |
|                     | PSS--Na+ (1/2)          | 169.3 | 1.6 | 19.6 |
|                     | PSSH (3/2)              | 168.5 | 1.6 | 14.3 |
|                     | PSSH (1/2)              | 169.7 | 1.6 | 14.0 |

|               |                         |       |     |      |
|---------------|-------------------------|-------|-----|------|
| PH1000<br>UVO | Thiophene 3/2 (Undoped) | 164.0 | 1.2 | 9.5  |
|               | Thiophene 1/2 (Undoped) | 165.2 | 1.2 | 9.3  |
|               | Thiophene 3/2 (Doped)   | 165.2 | 1.2 | 3.9  |
|               | Thiophene 1/2 (Doped)   | 166.4 | 1.2 | 3.8  |
|               | Shakeup 3/2             | 167.1 | 1.2 | 1.0  |
|               | Shakeup 1/2             | 168.3 | 1.2 | 0.9  |
|               | PSS--Na+ (3/2)          | 168.1 | 1.6 | 21.1 |
|               | PSS--Na+ (1/2)          | 169.3 | 1.6 | 20.6 |
|               | PSSH (3/2)              | 168.5 | 1.6 | 15.1 |
|               | PSSH (1/2)              | 169.7 | 1.6 | 14.7 |

**Table S 2:** Extracted data from XPS of the carbon regional scan of HTL Solar before and after UVO using the fitting model shown in **Figure S3**.

| Sample Identifier | Chemical Assignment | Position (eV) | FWHM | % Atomic Concentration |
|-------------------|---------------------|---------------|------|------------------------|
| No UVO            | C-C, C=C, C-S       | 285.0         | 1.4  | 68.9                   |
|                   | C-OH, C-O-C         | 286.5         | 1.4  | 23.8                   |
|                   | C-CF, C=O           | 287.7         | 1.4  | 5.6                    |
|                   | C-F                 | 288.5         | 1.4  | 0.0                    |
|                   | O-C=O               | 289.3         | 1.4  | 0.1                    |
|                   | pi-pi*              | 291.5         | 2.0  | 1.6                    |
| UVO               | C-C, C=C, C-S       | 285.0         | 1.4  | 69.6                   |
|                   | C-OH, C-O-C         | 286.6         | 1.4  | 18.6                   |
|                   | C-CF, C=O           | 287.7         | 1.4  | 5.7                    |
|                   | C-F                 | 288.5         | 1.4  | 0.0                    |
|                   | O-C=O               | 289.3         | 1.4  | 4.0                    |
|                   | pi-pi*              | 291.1         | 2.1  | 2.2                    |

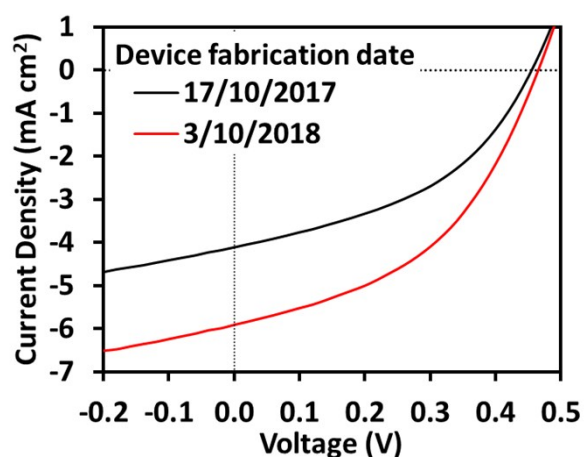

**Figure S4.** Test of inks stability as a function of time, these devices are prepared from the same batch of ink (prepared on 2/9/17) but with a year apart.

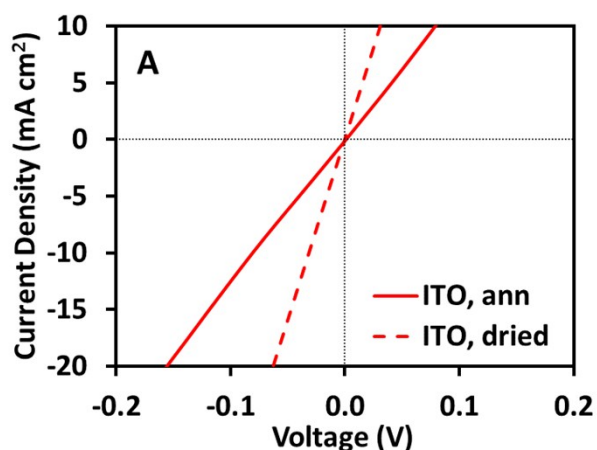

**Figure S5.** Testing the importance of the PEDOT:PSS layer for NP-OPV. The devices presented here has been prepared with the geometry glass/ITO/NP-active layer/Al, whereas this geometry work for BHJ devices it does not prepare working devices for NP-OPV.

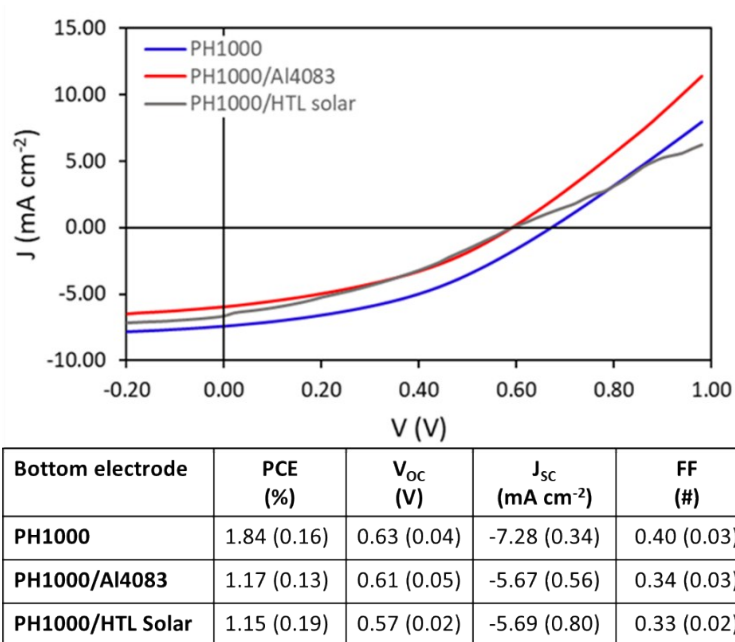

**Figure S6.** I-V curves of roll-to-roll prepared devices. The devices have been prepared with a bottom electrode of Ag/PH1000 for charge transport, the blue line is the I-V characteristics for a device prepared directly on top of PH1000, the red line has a layer of Al4083 as HTL and the grey line has a layer of HTL Solar as HTL. The device geometry was PET/Ag/PH1000/HTL (if applied)/Active layer/ZnO/Al (Sputtered)
